# Supplementary material for: Single-cell RNA sequencing reveals distinct tumor microenvironmental patterns in lung adenocarcinoma
Source: bioRxiv or medRxiv preprint supplement (doi:10.1101/2020.12.11.419606), 2020-12-11
Supplement: Supplementary file [file media-1.pdf]

## **Supplemental Figures**

### **Single-cell RNA sequencing reveals distinct tumor microenvironmental patterns in lung adenocarcinoma**

Philip Bischoff<sup>\*,1,2</sup>, Alexandra Trinks<sup>1,2</sup>, Benedikt Obermayer<sup>3</sup>, Jan Patrick Pett<sup>3</sup>, Annika Lehmann<sup>1</sup>, Philipp Jurmeister<sup>1,2,7</sup>, Aron Elsner<sup>4</sup>, Tomasz Dziodzio<sup>4</sup>, Jens-Carsten Rückert<sup>4</sup>, Jens Neudecker<sup>4</sup>, Christine Falk<sup>5,6</sup>, Dieter Beule<sup>3</sup>, Christine Sers<sup>1,2,7</sup>, Markus Morkel<sup>1,2,7</sup>, David Horst<sup>1,2,7</sup>, Nils Blüthgen<sup>#,1,2,7,8</sup>, Frederick Klauschen<sup>#,1,7</sup>

#### Affiliations:

- 1) Institute of Pathology, Charité - Universitätsmedizin Berlin, Charitéplatz 1, 10117 Berlin, Germany
- 2) Berlin Institute of Health, Anna-Louisa-Karsch-Straße 2, 10178 Berlin, Germany
- 3) Core Unit Bioinformatics (CUBI), Charité - Universitätsmedizin Berlin, MDC Berlin, and Berlin Institute of Health, Charitéplatz 1, 10117 Berlin
- 4) Department of Surgery, Campus Charité Mitte and Campus Virchow-Klinikum, Charité – Universitätsmedizin Berlin, Charitéplatz 1, 10117 Berlin, Germany
- 5) Institute of Transplant Immunology, Hannover Medical School, Carl-Neuberg-Str. 1, 30625 Hannover, Germany
- 6) DZIF, German Center for Infectious Diseases, TTU-IICH Hannover-Braunschweig site, 38124 Braunschweig, Germany
- 7) German Cancer Consortium (DKTK), Partner Site Berlin, and German Cancer Research Center (DKFZ), 69120 Heidelberg, Germany
- 8) IRI Life Sciences, Humboldt University of Berlin, Philippstrasse 13, 10115 Berlin, Germany

\* first author, corresponding author: philip.bischoff@charite.de, +49 30 450 536 127

# joint last authors

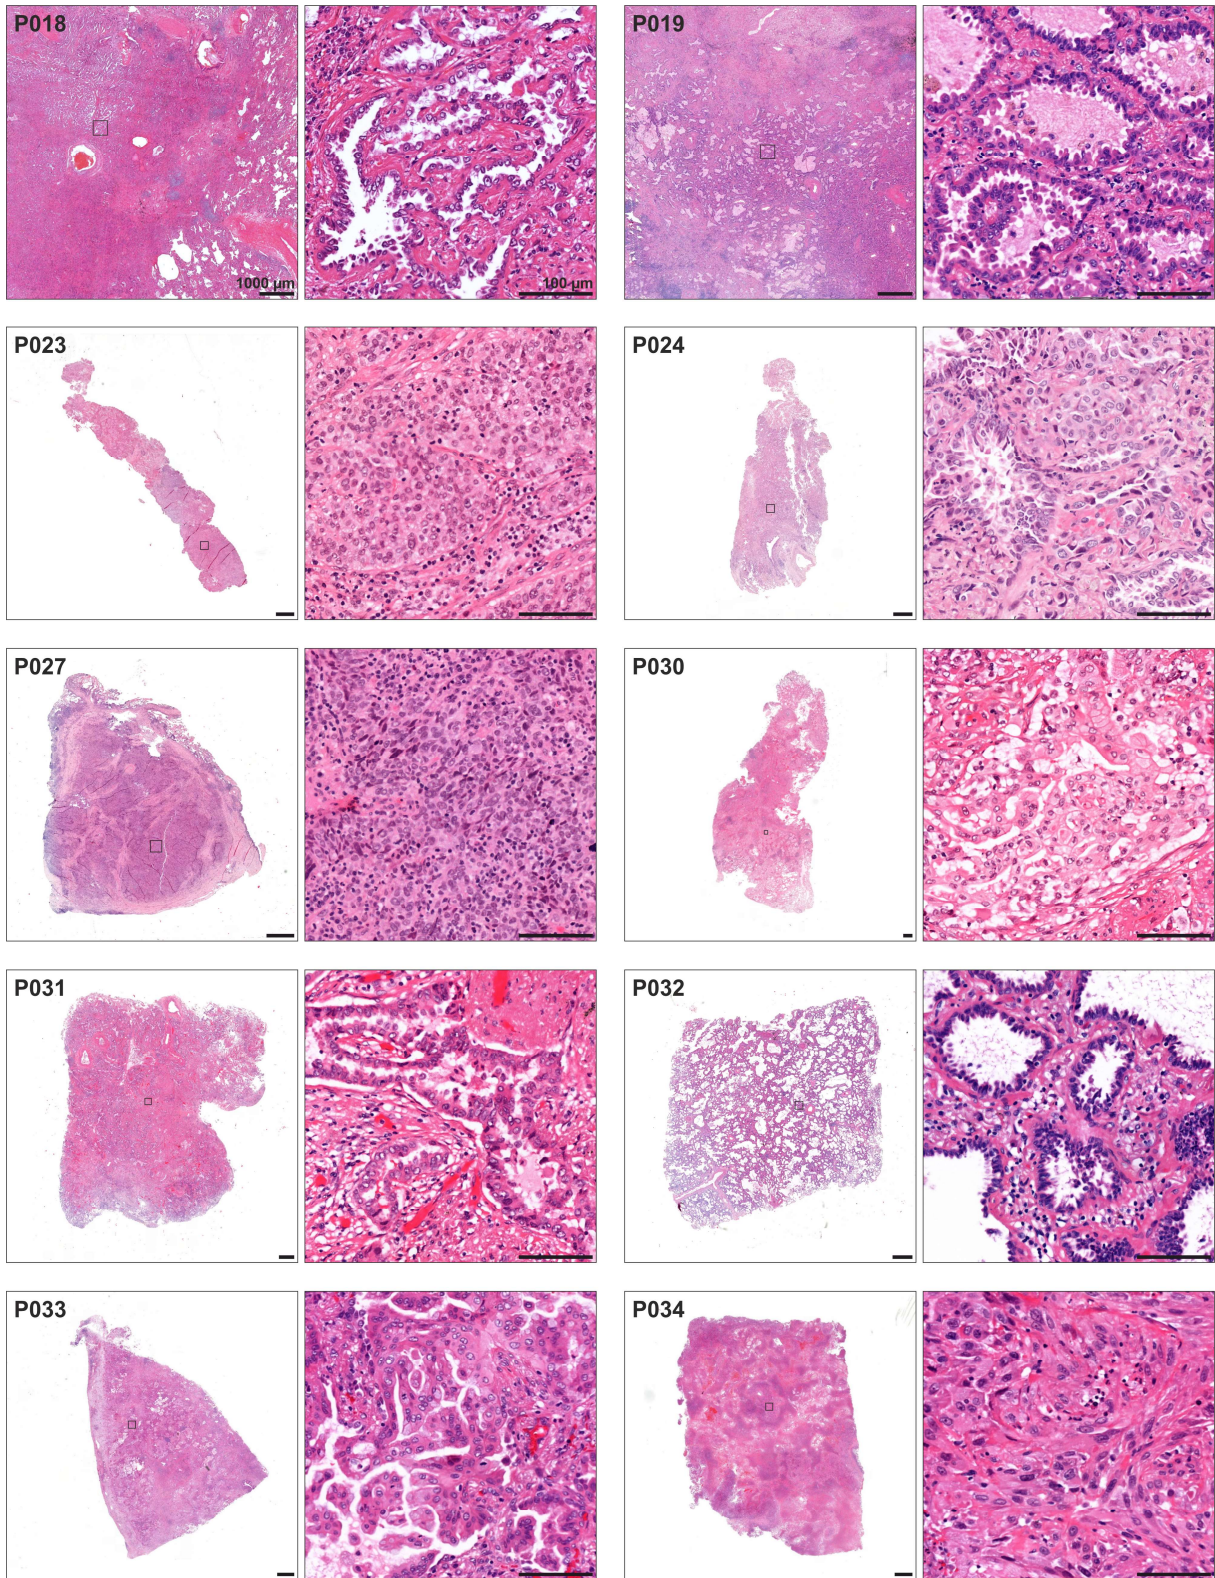

**Supplemental Figure 1**

H&E staining of lung adenocarcinomas analyzed in the study. For patients P018 and P019, representative tumor tissue shown, for all other patients, consecutive tissue sections of the sample used to prepare single-cell suspensions is shown. Black squares indicate magnified areas. Scale bars indicate 1000  $\mu\text{m}$  or 100  $\mu\text{m}$  in overview or magnified images, respectively.

**A**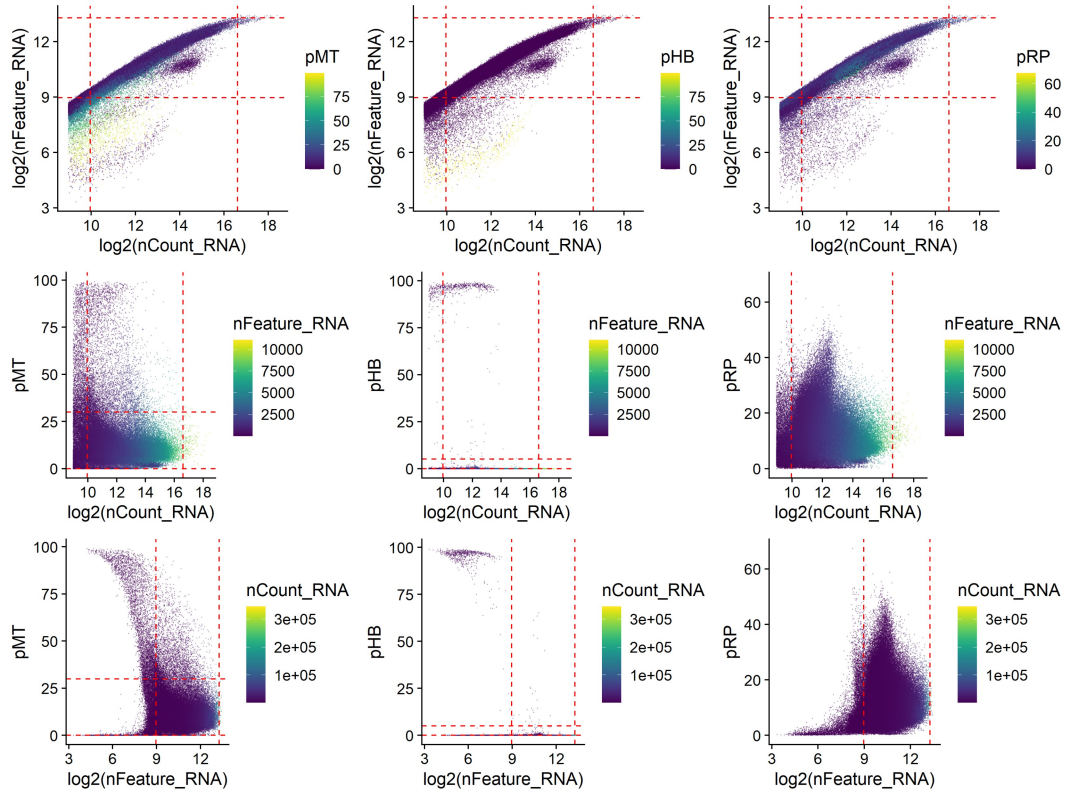**B**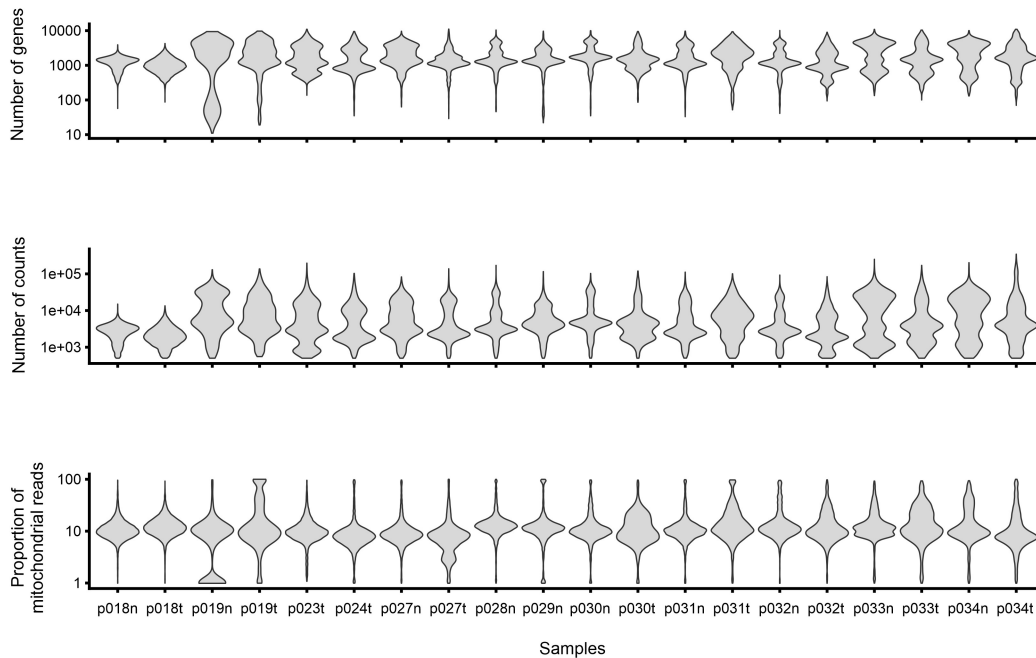**Supplemental Figure 2**

(A) Scatter plots of quality control parameters of all single-cell transcriptomes analyzed in the study, red dashed lines indicate cut-off values for filtering of high-quality transcriptomes. (B) Violin plots of selected quality control parameters grouped by tissue sample, n = normal tissue, t = tumor tissue.



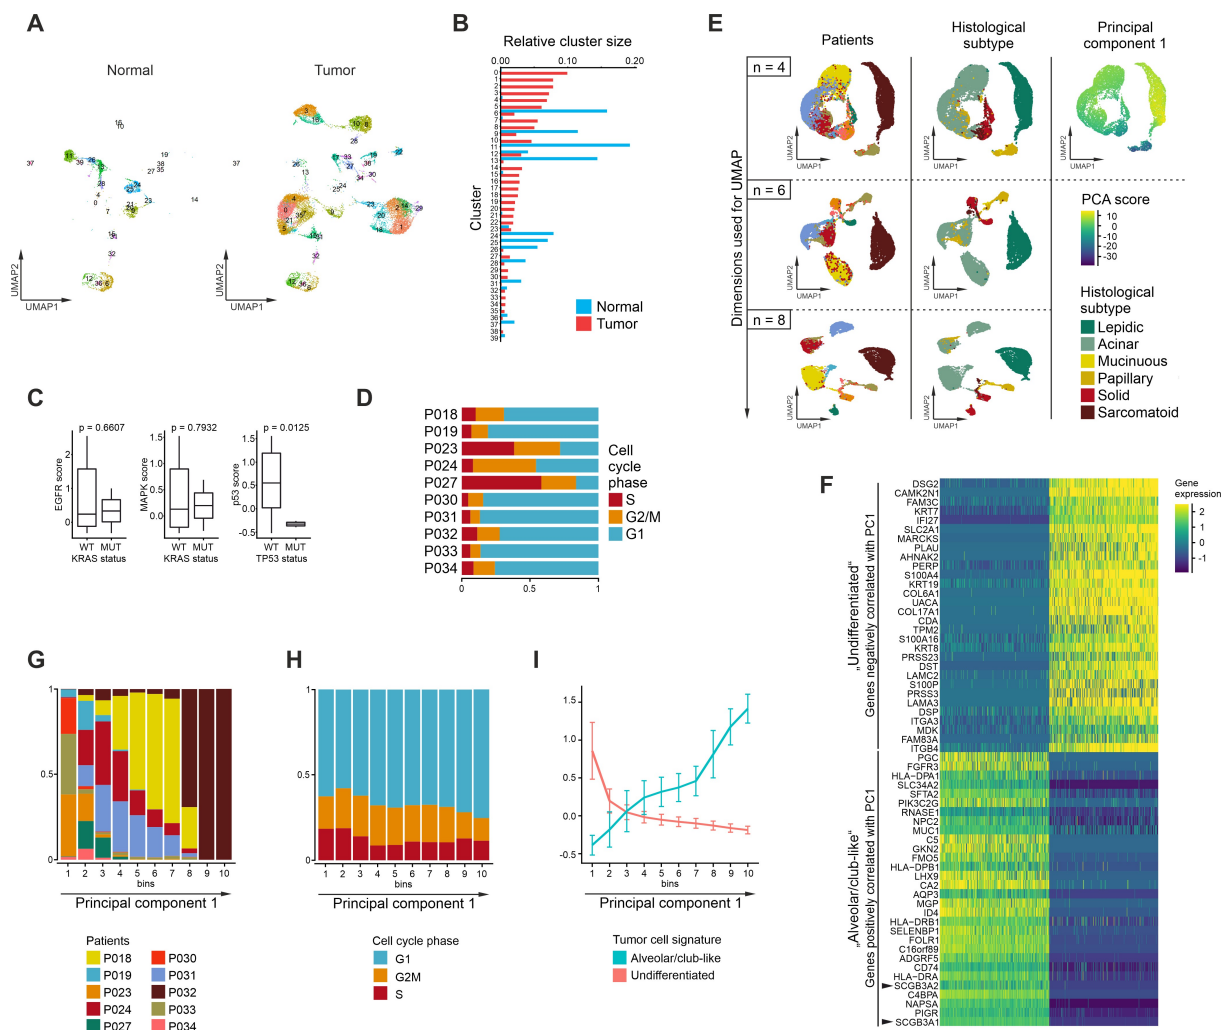

### Supplemental Figure 3

(A) UMAPs based on the top 20 principal components of all epithelial single-cell transcriptomes split by tissue type, color-coded by cluster, cluster number indicated. (B) Relative size of clusters within normal (blue) or tumor (red) tissue samples, respectively. (C) Pathway activity scores of selected signaling pathways in KRAS wildtype and mutated, or TP53 wildtype and mutated patients, respectively; Welch's t-test statistics. (D) Quantification of cell cycle phase of tumor epithelial cells, grouped by patients. (E) UMAPs of tumor epithelial cells based on the top 4, 6, or 8 principal components, color-coded by patient, histological subtype, or the score of principal component 1; for patient color code see (G). (F) Heatmap of the top 30 genes positively or negatively correlated with principal component 1, respectively, shown for the top 500 cells with the highest or lowest PCA scores, respectively. (G+H) Distribution of (H) patients and (G) cell cycle phase of tumor epithelial cells sorted along principal component 1. (I) Mean module scores of the tumor cell signatures based on the top 30 genes positively or negatively correlated with principal component 1 (see (F)), respectively, in tumor epithelial cells sorted along principal component 1.



A

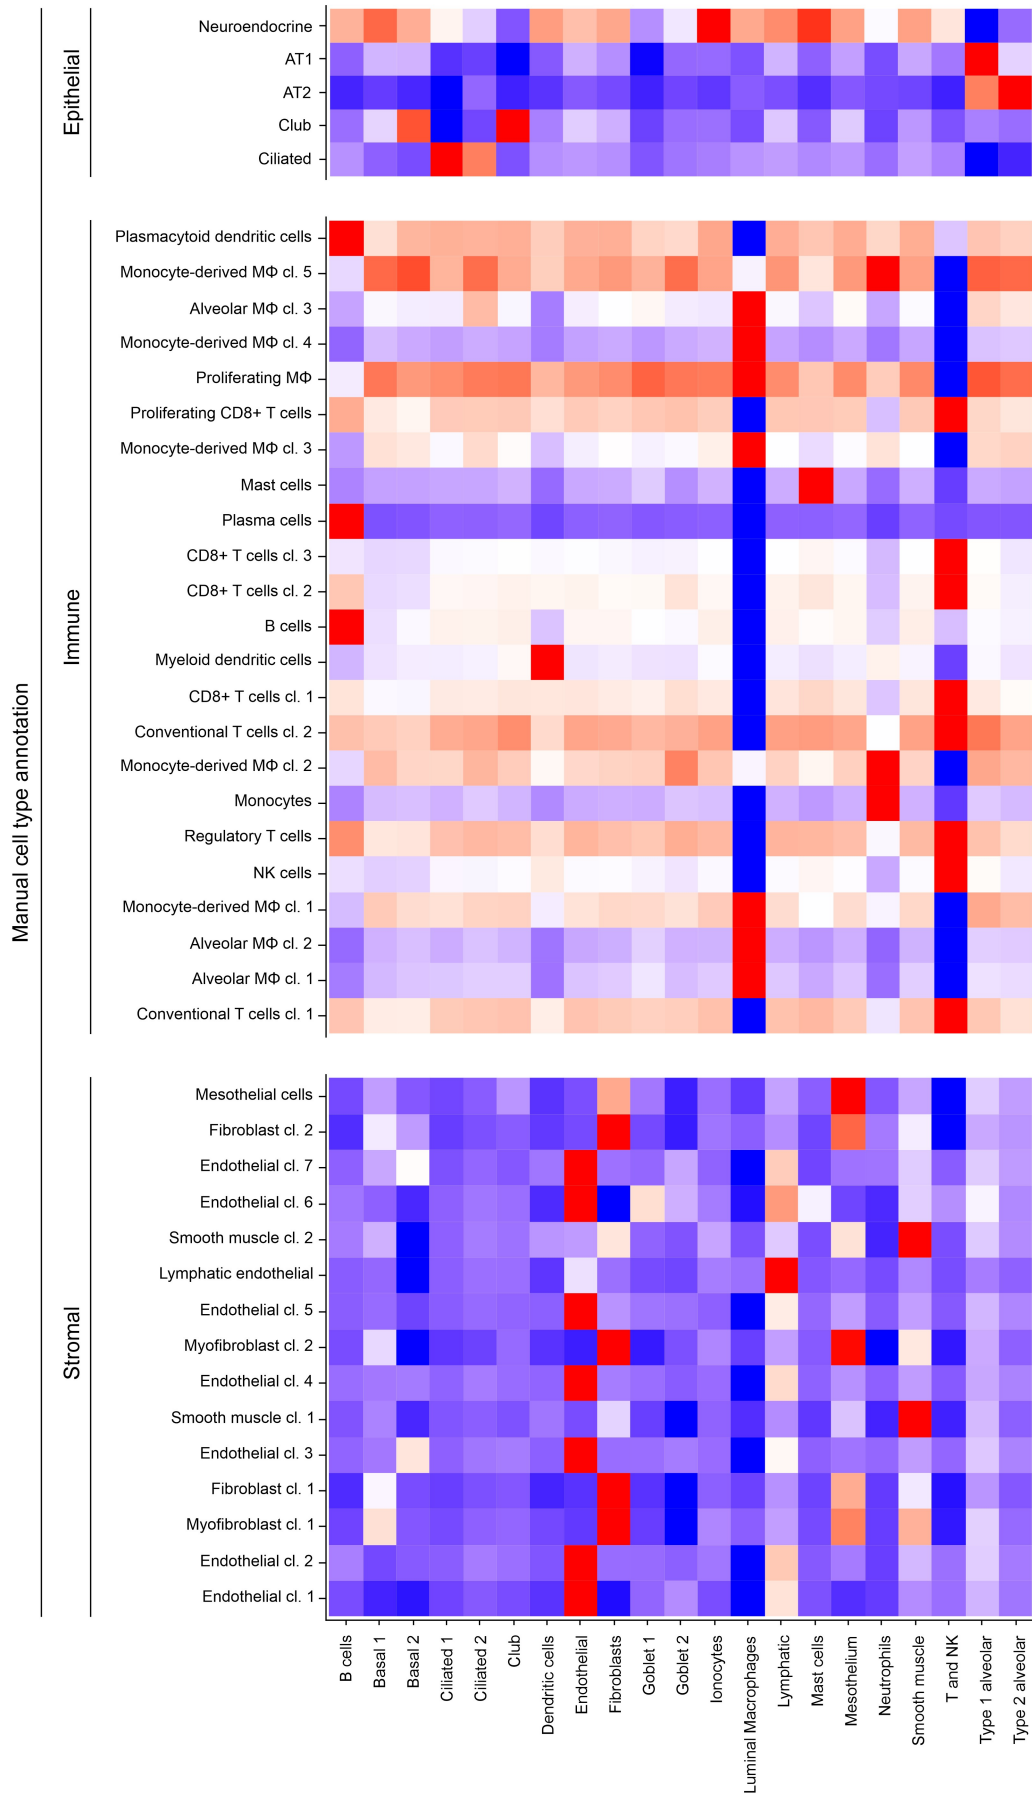

Cell type gene signatures (Vieira Braga et al. 2019)

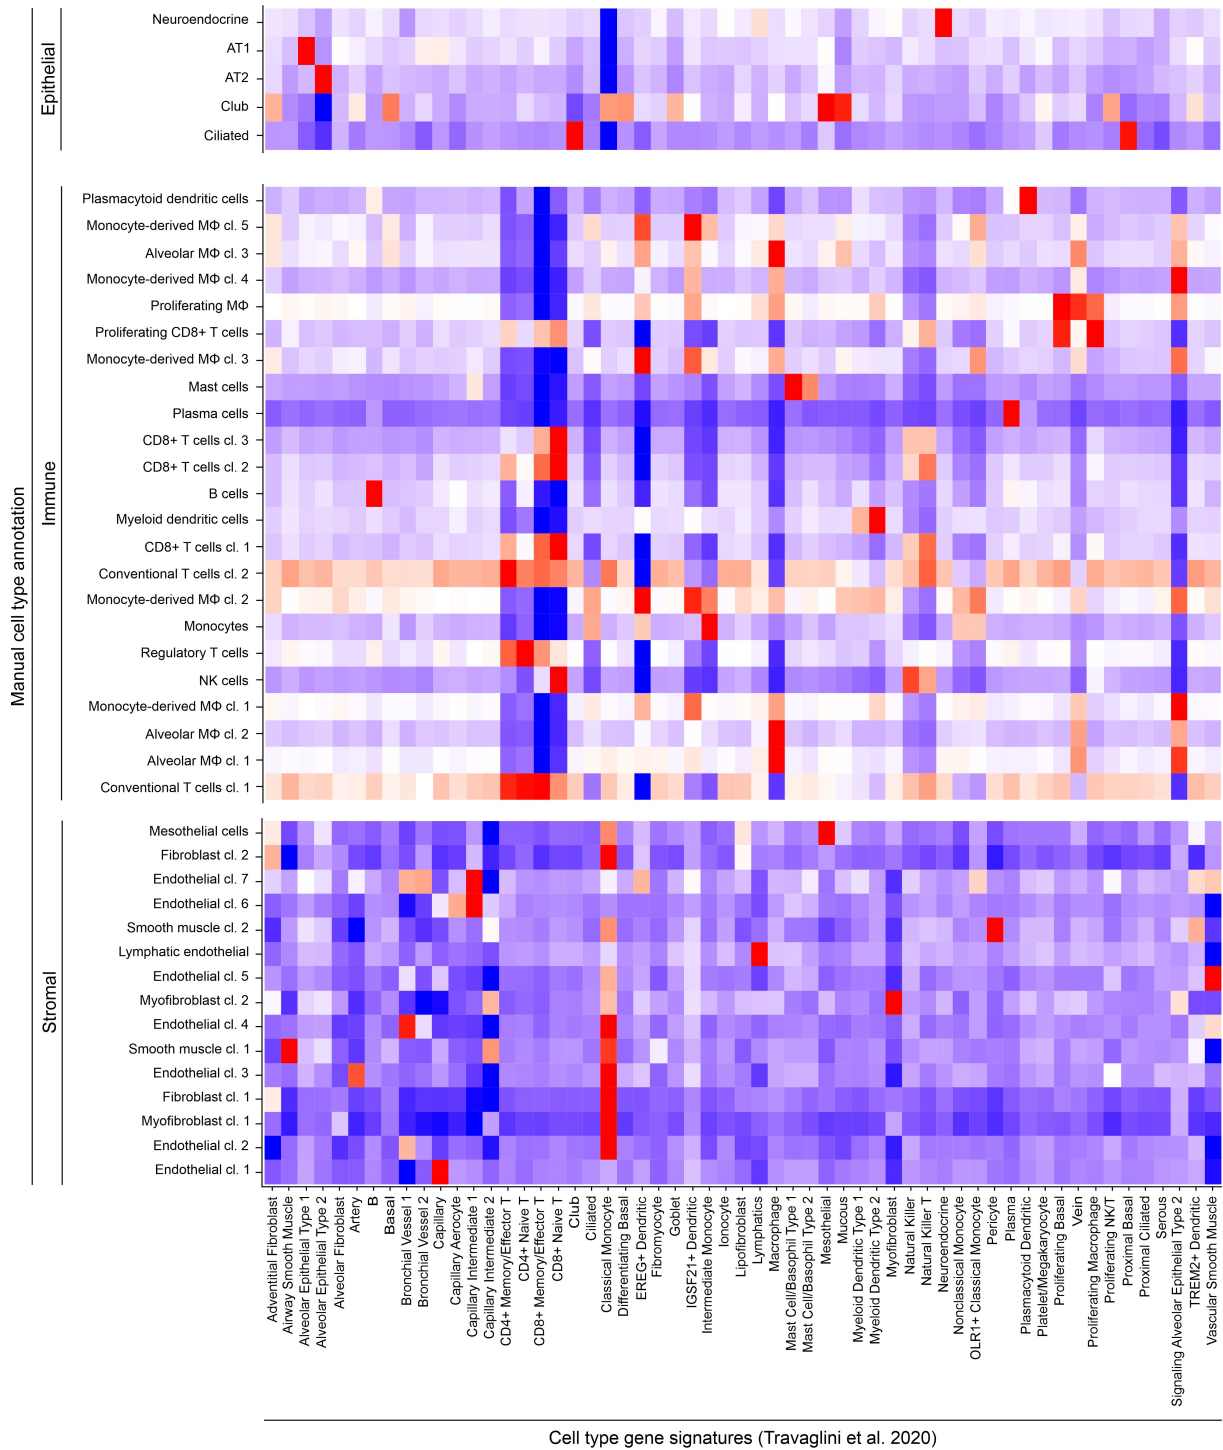

### Supplemental Figure 4

(A+B) Mean module scores of cell type gene signatures according to (A) Vieira Braga et al. or (B) Travaglini et al. for manually annotated epithelial, immune and stromal cell clusters.

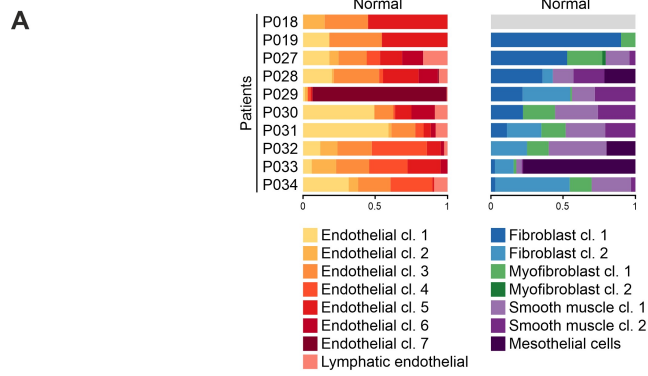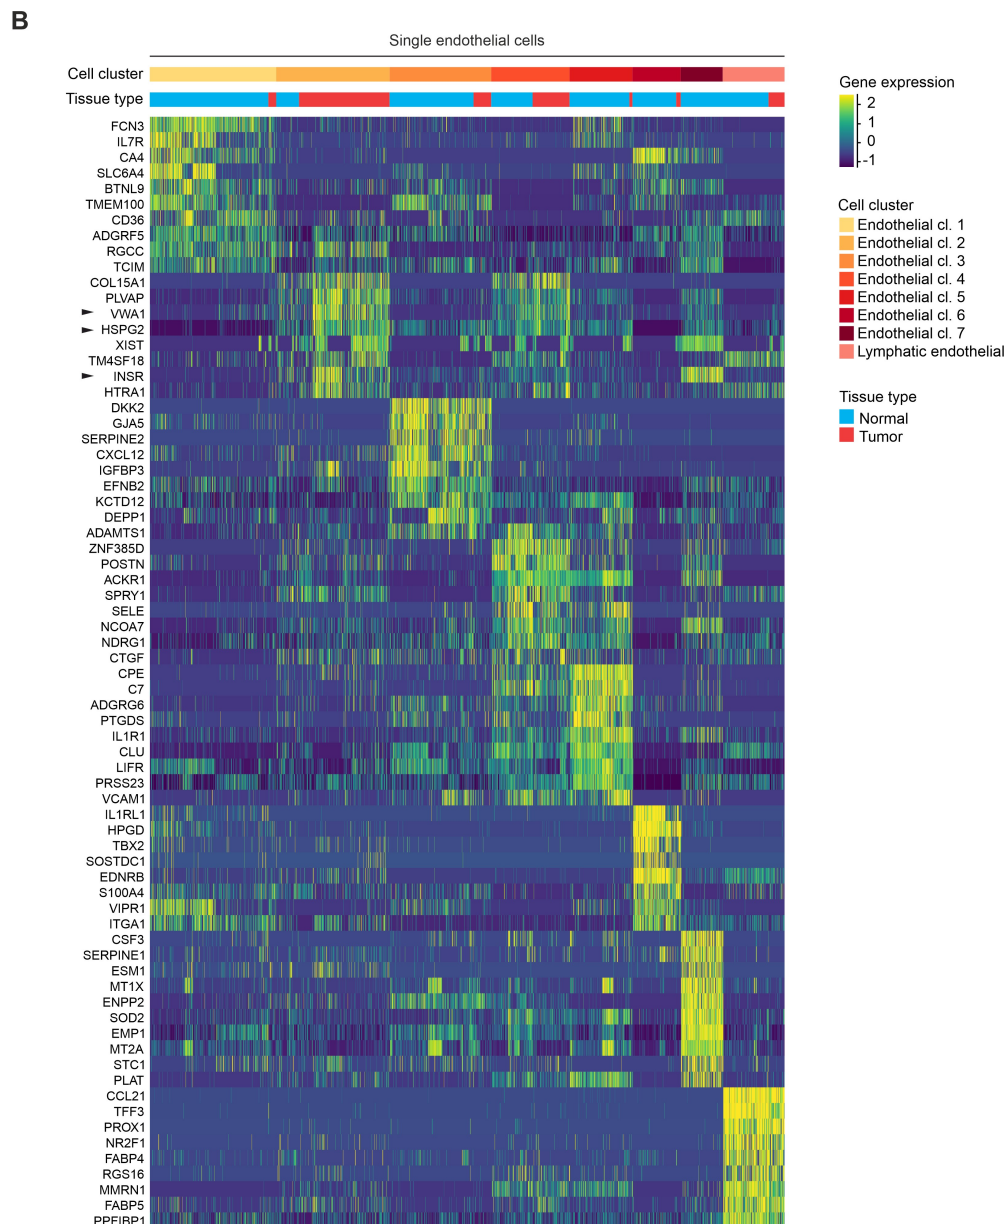

### Supplemental Figure 5

(A) Quantification of endothelial and fibroblastic/muscle cell clusters per patient for normal tissue samples. (B) Differentially expressed genes of endothelial cell clusters, maximum top 10 genes showed per cluster, black arrowheads indicate genes mentioned in the main text.



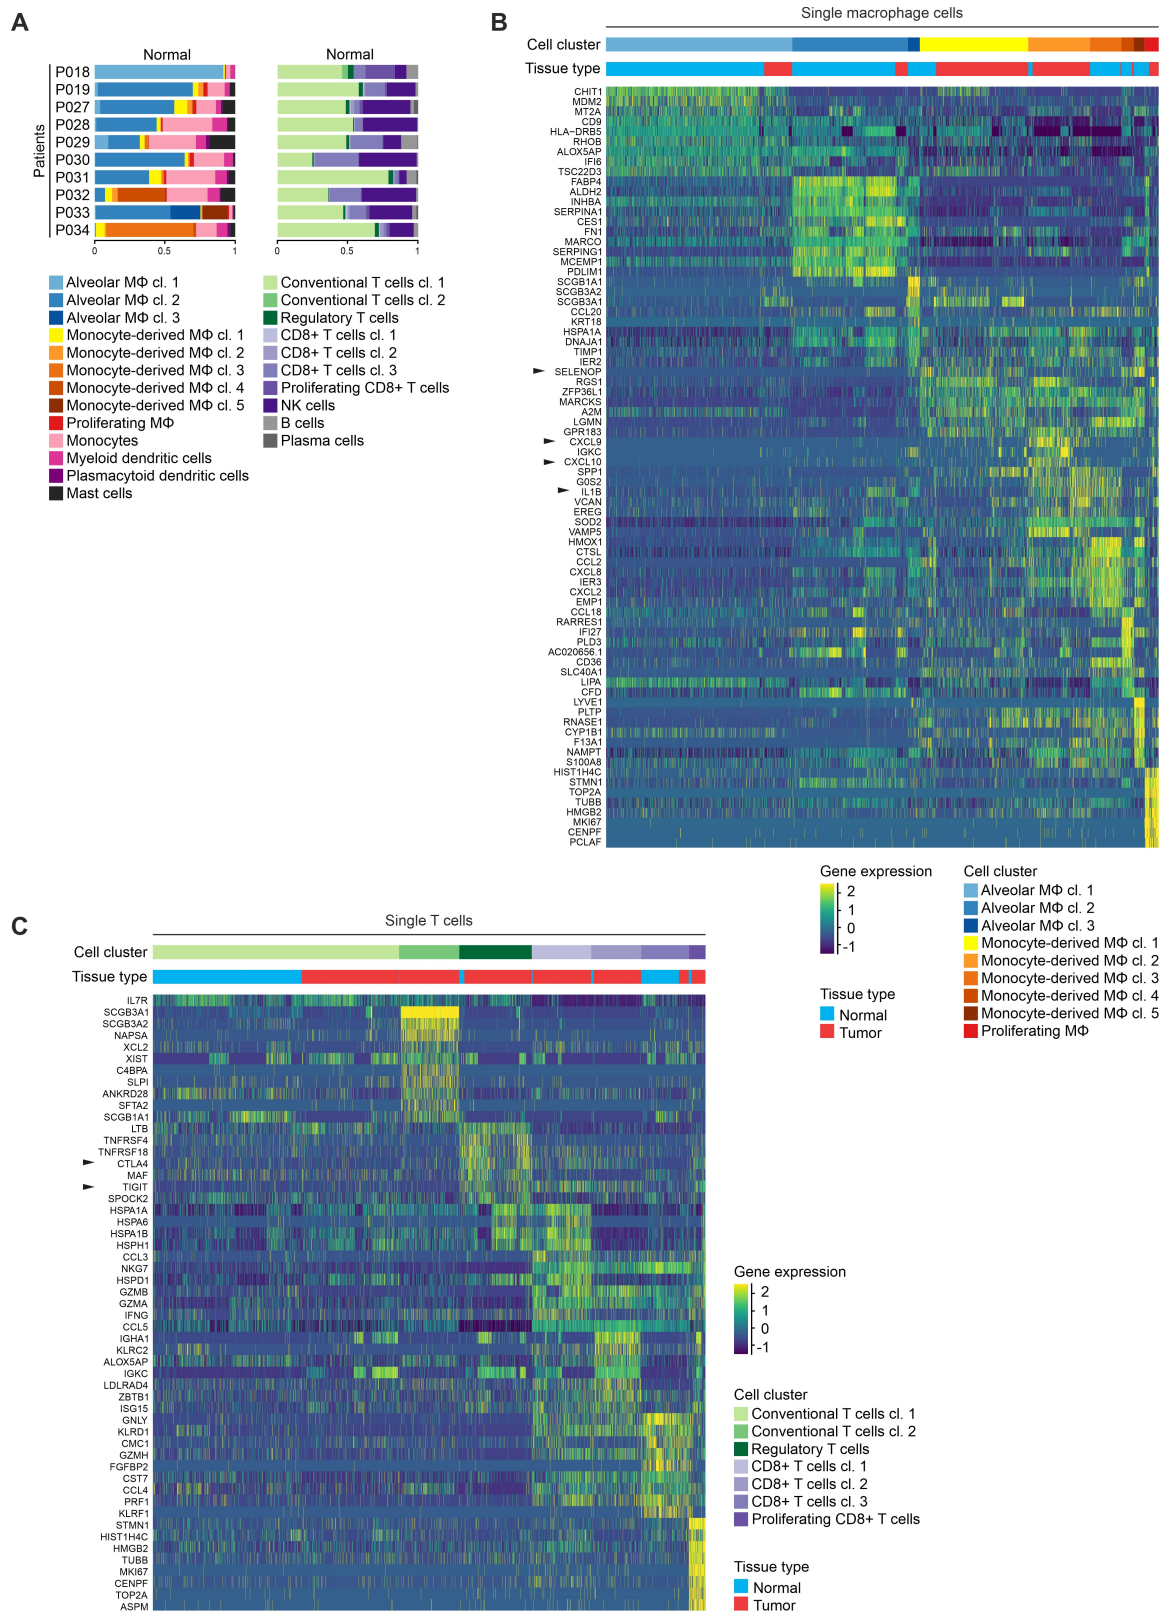

**Supplemental Figure 6**

(A) Quantification of myeloid and lymphoid cell clusters per patient for normal tissue samples. (B) Differentially expressed genes of macrophage cell clusters, maximum top 10 genes showed per cluster, black arrowheads indicate genes mentioned in the main text. (C) Differentially expressed genes of T cell clusters, maximum top 10 genes showed per cluster, black arrowheads indicate genes mentioned in the main text.

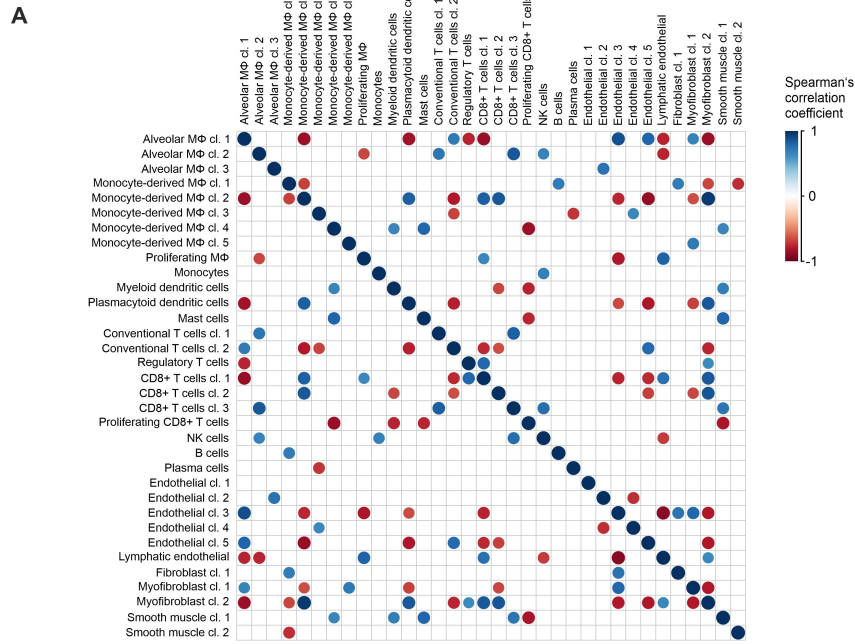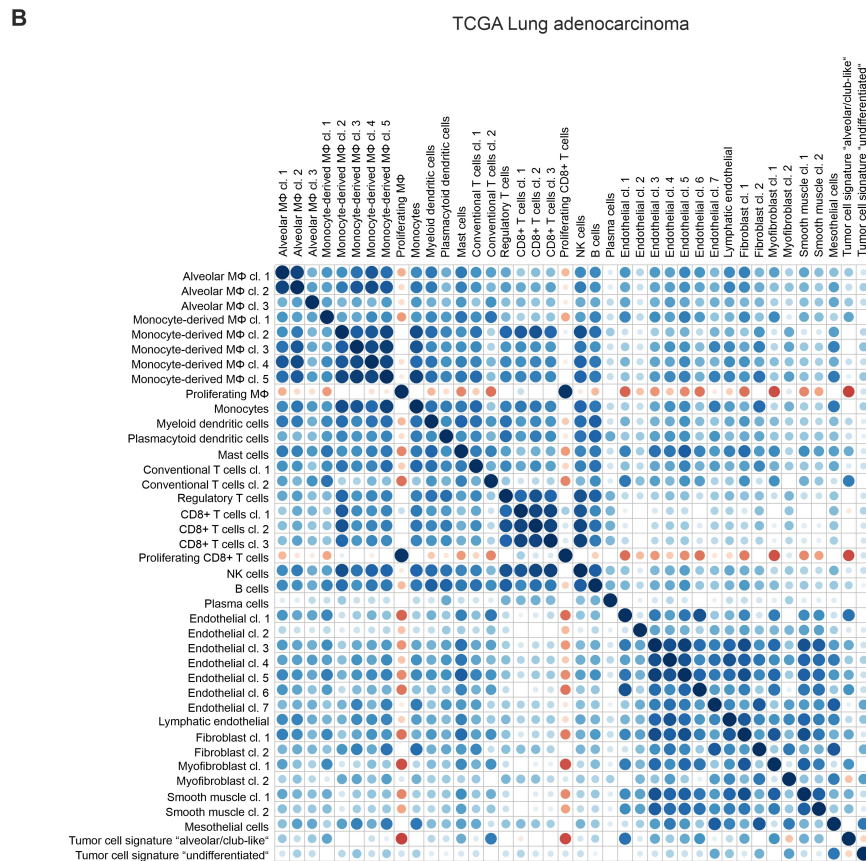

### Supplemental Figure 7

(A) Correlation of the proportion of immune and stromal cell clusters in tumor tissue samples, cell clusters occurring in less than three tumor tissue samples were excluded from analysis; Spearman's correlation statistics, only correlations with  $p < 0.05$  shown. (B) Correlation of ssGSEA enrichment scores of cell cluster marker gene signatures in the TCGA lung adenocarcinoma cohort; Spearman's correlation statistics, only correlations with  $p < 0.05$  shown.
